# Supplementary material for: Isolated Familial Hypogonadotropic Hypogonadism and aGNRH1Mutation
Source: Atypon-hosted journal article supplement (doi:10.1056/nejmoa0900136), 2009-06-18
Supplement: nejm_bouligand_2742sa1.pdf [file nejm_bouligand_2742sa1.pdf]

## Supplementary Appendix

This appendix has been provided by the authors to give readers additional information about their work.

Supplement to: Bouligand J, Ghervan C, Tello JA, et al. Isolated familial hypogonadotropic hypogonadism and a *GNRH1* mutation. *N Engl J Med* 2009;360:2742-8. DOI: 10.1056/NEJMoa0900136.

## Supplementary Appendix

### *Part 1 - GNRH1 and GNRH2 sequencing*

Coding-exons 1, 2 and 3 and intron-exon junctions of *GNRH1* and coding-exons 2, 3 and 4 and intron-exon junctions of *GNRH2* were amplified by polymerase chain reaction (PCR) using genomic DNA as a template. PCR was performed in a final volume of 20  $\mu$ L containing 50 ng of genomic DNA, 10 pmol of sense and antisense oligonucleotides, 200  $\mu$ M each dNTP, 1.5 mM MgCl<sub>2</sub>, PCR buffer (pH 8.3) and 0.2 U of Taq Polymerase (Yellow Star<sup>®</sup>, Eurogentec<sup>™</sup>, Angers, France). Following denaturation for 4 minutes at 94°C, 30 cycles of amplification were carried out in a thermocycler. Each cycle consisted of an initial 30-second denaturation at 94°C, 1-minute annealing at 58°C and 1-minute elongation at 72°C. The amplification cycles were followed by a final elongation step of 8-minutes at 72°C. The PCR products were sequenced in both directions by using sense or antisense primers and the Big Dye terminator kit v1.1 (Applied Biosystems<sup>™</sup>, Foster City, CA). The same primers (Table 1S) were used for PCR and sequencing. The conditions employed were as recommended by the manufacturer, with an initial 3-minute denaturation step at 96°C and 30 cycles with a 10-second denaturation at 96°C, 5-second annealing at 50°C and 4-minute elongation at 60°C. Linear amplification products were then separated in an automated capillary sequencer (ABI PRISM 3130xl Genetic Analyzer, Applied Biosystems<sup>™</sup>, Foster City, CA). Electropherogram-derived sequences were compared to NCBI reference

sequences for either *GNRH1* (GenBank accession numbers: contig NC\_000008.9 and transcripts NM\_000825.3 and NM\_001083111.1) or *GNRH2* (GenBank accession numbers: contig NC\_000020.9 and transcript NM\_001501.1) using Seqscape<sup>®</sup> software (Applied Biosystems<sup>™</sup>, Foster City, CA)

Table 1S: Primers for *GNRH1* and *GNRH2* PCR amplification and sequencing

| Name        | Amplicon size | Sense primers                | Antisense primers    |
|-------------|---------------|------------------------------|----------------------|
| GNRH1-exon1 | 383 bp        | <b>CCATCTTCTGCAGGGTTAGTG</b> | GCCTTATCTCACCTGGAGCA |
| GNRH1-exon2 | 230 bp        | GGTGGAAATGGAAAACACCA         | ATCCCCAAAGGCTTATCCAC |
| GNRH1-exon3 | 384 bp        | CAAACAGACCAATTCCTTCCA        | TCCCTTTGGTGGGTTTACAG |
| GNRH2-ex2/3 | 575 bp        | AGTGGCCCTGGAGGAAGTAG         | ACCCAACCCTAAGCCACAAT |
| GNRH2-exon4 | 176 bp        | AGGGGAGAGAACCAGGAAGA         | AGGGGACGAAGGACAGAACT |

Legend to table 1S :

The sense and antisense primers were designed with the online version 0.4 of Primer 3. All primers were blasted to check their selectivity on the NCBI website, using the Human Genomic Plus Transcript database (<http://blast.ncbi.nlm.nih.gov/Blast.cgi>). The sequences in bold indicate exonic primers, while the others are intronic.

## Supplementary Appendix

### Part 2 - Variable Number Tandem Repeat (VNTRs) Analysis

New and commercial VNTRs (Linkage mapping set, Applied Biosystems™) were amplified by PCR using genomic DNA as template. PCR was performed in a final volume of 20 µL containing 30 ng of genomic DNA, 10 pmol of sense and antisense oligonucleotides, 200 µM each dNTP, 1.5 mM MgCl<sub>2</sub>, PCR buffer and 0.2 U of Taq Polymerase (Yellow Star®, Eurogentec™, Seraing, Belgium). Sense primers (new primers for VNTRs) were labeled by the fluorochrome FAM in 5' (Table 2S). Following denaturation for 3 min at 94°C, 30 cycles of amplification were carried out in a thermocycler. Each cycle consisted of initial 30-s denaturation at 94°C, 30-s annealing at 56°C and 30-s elongation at 72°C. Followed by a final elongation step of 10-min at 72°C. The fluorescent PCR products were analyzed in an automated capillary sequencer (ABI PRISM 3130xl Genetic Analyzer, Applied Biosystems™). Amplicons sizes were determined by comparison with size markers with Genscan® analysis software (Applied Biosystems™).

Table 2S: Primers for VNTRs analysis around GNRH1 locus (-14 Mb to +32 Mb).

| Name (localisation) | Type      | Sense primer<br>(New VNTRs with 5'FAM) | Antisense Primer        | Position (Kbp)       |
|---------------------|-----------|----------------------------------------|-------------------------|----------------------|
| D8S285 (+32 Mb)     | CA repeat | D8S285F (ABI panel 12)                 | D8S285R (ABI panel 12)  | 8p12 – 57.230 Kbp    |
| D8S505 (+9 Mb)      | CA repeat | D8S505F (ABI panel 12)                 | D8S505R (ABI panel 12)  | 8p12 – 34.751 Kbp    |
| VNTR8-895 (+2 Mb)   | CA repeat | CCAGCATTTTACAGGGCTAT                   | TCAGTTACCCCAAGGGAAAT    | 8p21 – 26.826 Kbp    |
| D8S1771 (+0.2 Mb)   | TG repeat | D8S1771F (ABI panel 12)                | D8S1771R (ABI panel 12) | 8p21 – 25.497 Kbp    |
| VNTR8-966 (+43Kb)   | TG repeat | CTGCAGTGTTGTCCTCCAAA                   | GAAGACCCCAAGGGCTTACTC   | 8p21 – 25.382 Kbp    |
| VNTR8-665 (+1Kb)    | CA repeat | TCCAATTGGTTTGTGTTTGC                   | ACCTCCCAGCCTACATCCTT    | 8p21 – 25.340 Kbp    |
| VNTR8-197 (-22Kb)   | TG repeat | TGTGCCAGAGGTTGTATGGA                   | GTGCAAAGCTCCTGCTCTTC    | 8p21 – 25.310 Kbp    |
| VNTR8-963 (-2 Mb)   | TG repeat | AGTGCAGTGGTGTGAGCTTG                   | CTCCCTTCTTCCGAATGTT     | 8p21 – 23.329 Kbp    |
| D8S258 (-5 Mb)      | TG repeat | D8S258F (ABI panel 11)                 | D8S258R (ABI panel 11)  | 8p21p22 – 20.412 Kbp |
| D8S549 (-10 Mb)     | CA repeat | D8S549F (ABI panel 11)                 | D8S549R (ABI panel 11)  | 8p22 – 15.694 Kbp    |
| D8S550 (-14 Mb)     | TG repeat | D8S550F (ABI panel 12)                 | D8S550R (ABI panel 12)  | 8p23 – 10.919 Kbp    |

Legend to table 2S :

New and commercial VNTRs (Applied Biosystems™) are localized from -14Mb to +32 Mb around the *GNRH1* locus (25.339 Kbp to 25.332 Kbp, negative strand) on the short arm of the chromosome 8 (8p21). New VNTRs primers were designed according to the microsatellite database (<http://www.microsatellites.org/about.htm>). The sense and antisense primers were designed with the online version 0.4 of Primer 3. All primers were blasted to check their selectivity on the NCBI website, using the Human Genomic Plus Transcript database (<http://blast.ncbi.nlm.nih.gov/Blast.cgi>). Their precise chromosomal

localization were verified online by electronic-PCR (<http://www.ncbi.nlm.nih.gov/sutils/e-pcr/reverse.cgi>).

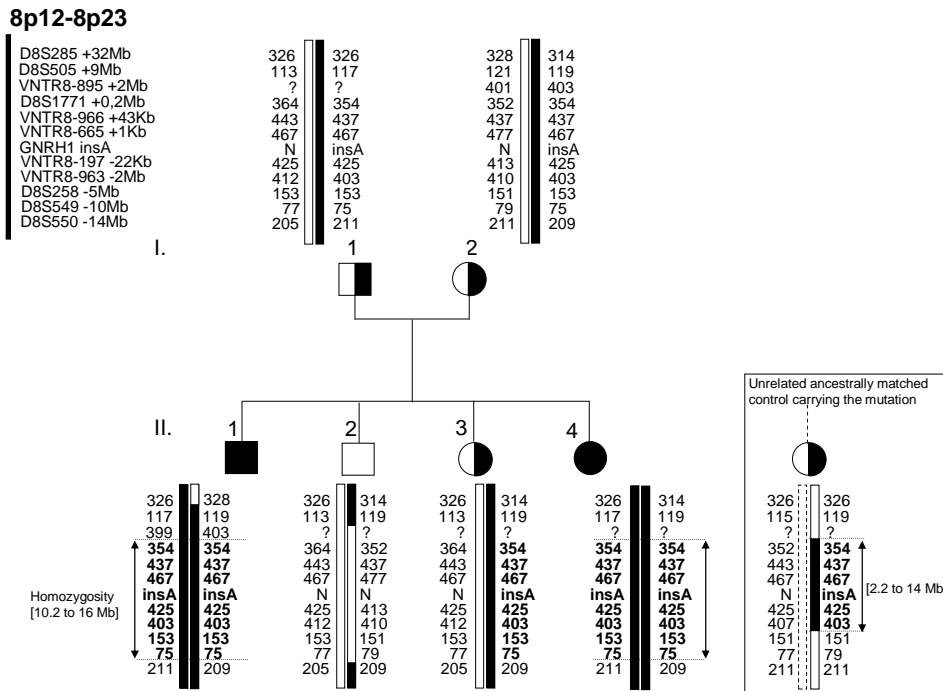

Figure 1S – Pedigree and Haplotype Analysis

Variable number tandem repeats (VNTRs: CA or TG repeats) from -14 Mb to +32 Mb surrounding the *GNRH1* gene were analyzed for all the family members and for an unrelated ancestrally matched control carrying the heterozygous mutation c.18-19 ins A of *GNRH1*. The amplicon sizes (bp) determined for each VNTR were used to construct the haplotypes and are reported for each person in the pedigree. The homozygous segment range is indicated by a double arrow and bold characters in the two affected family members (II.1 and II.4). A double arrow for the unrelated ancestrally matched heterozygous control indicates the common haplotype encompassing the mutation.

### Supplementary Appendix

#### Part 3 - In vitro Analysis of the *GNRH1* mutation

Primers used for in vitro mutagenesis:

5'-ttctaaggcacatgaatgcac-3'

5'-tgaagccaattcaaaaaactcctagctgg-3'.

AtT-20 cells were grown in 6 cm cell culture plates (Corning Inc., USA) and transfected with the indicated expression constructs using Fugene 6 (Roche Diagnostics GmbH, Germany). They were maintained in OPTI-MEM serum reduced media (Invitrogen, USA) and the conditioned media was

collected 48 hours post-transfection then snap frozen on dry ice. GnRH was measured in conditioned media by radioimmunoassays.
